# Supplementary material for: Preoperative environment enrichment preserved neuroligin 1 expression possibly via epigenetic regulation to reduce postoperative cognitive dysfunction in mice
Source: PubMed Central journal article supplement (PMC8928916; doi:10.1111/cns.13777), 2021-12-09

**Fig3-A**  
**Neurologin 1 on Hippocampus**

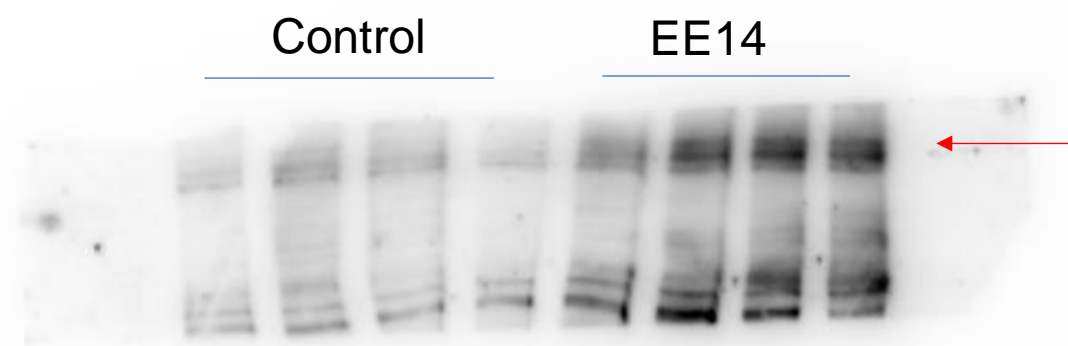

**Fig3-A**  
 **$\alpha$ -Tubulin on Hippocampus**

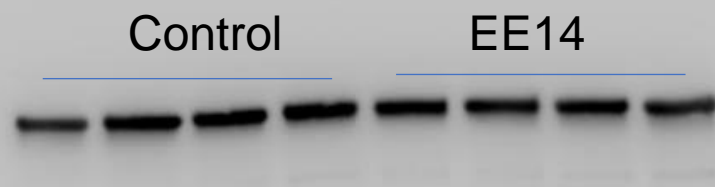

**Fig3-A**  
**Histone H3 on Hippocampus**

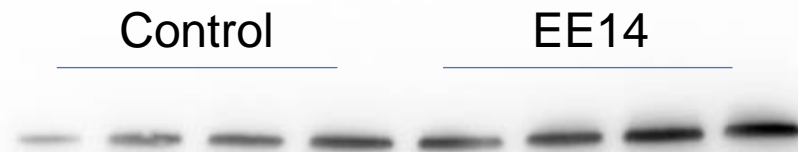

**Fig3-A**  
**Histone H4 on Hippocampus**

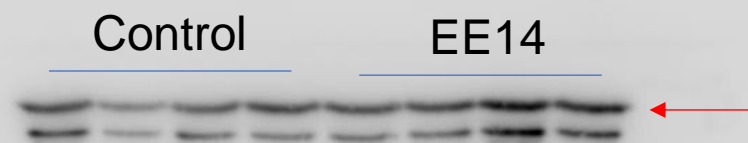

**Fig3-A**

**$\alpha$ -Tubulin on Hippocampus**

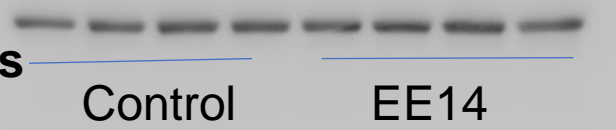

**Fig3-B**  
**Neurologin 1 on Cortex**

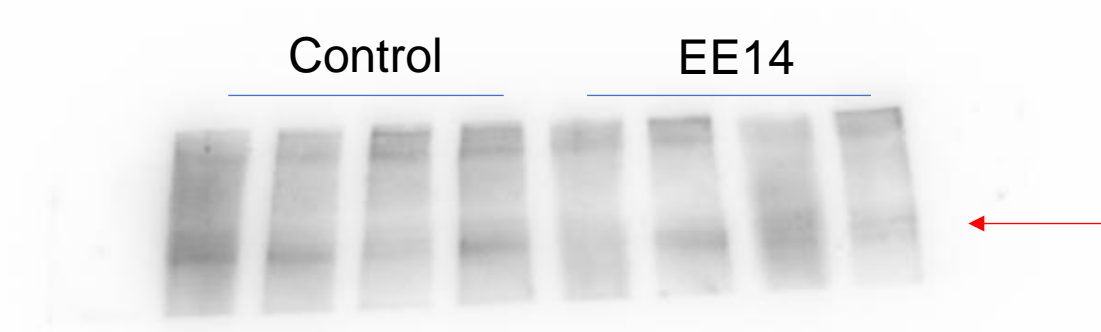

**Fig3-B**  
**Histone H3 on Cortex**

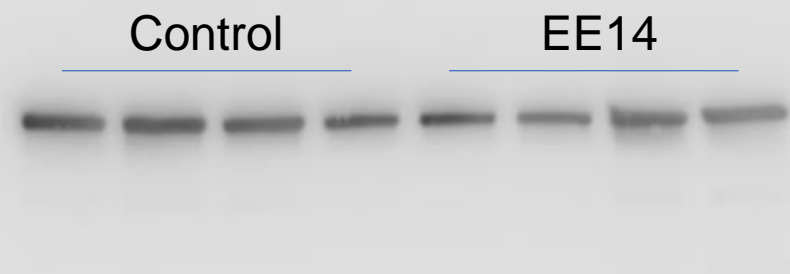

**Fig3-B**  
**Histone H4 on Cortex**

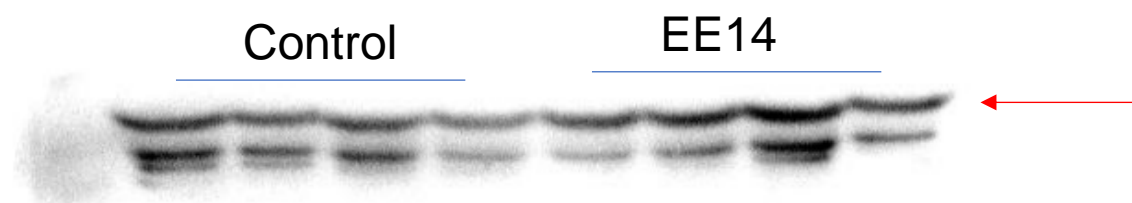



**Fig3-B**  
 **$\alpha$ -Tubulin on Cortex**

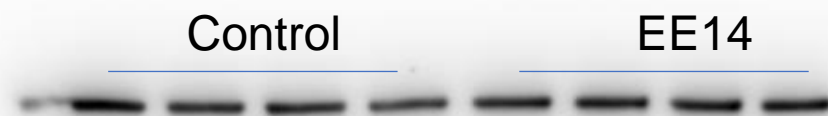

**Fig4-A**  
**Neurologin 1 on Hippocampus**

Control   Surg   EE14+surg

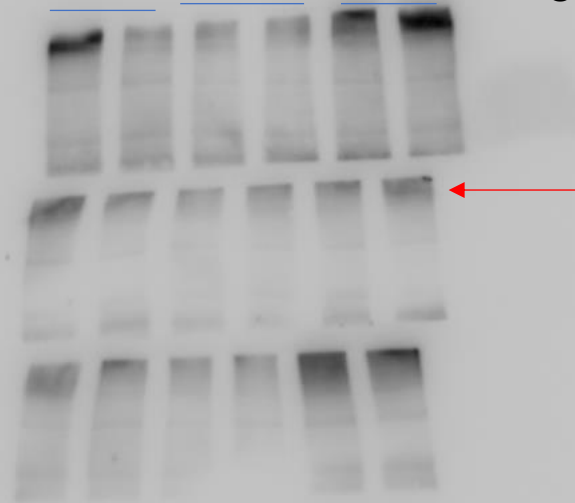

**Fig4-A**  
**Histone H3 on Hippocampus**

Control      Surg      EE14+surg

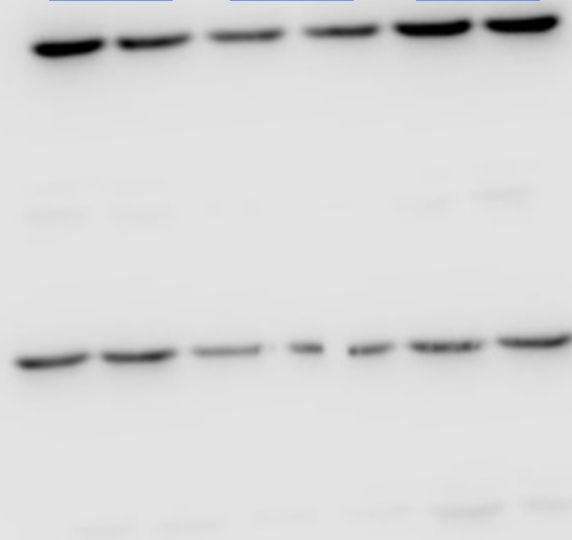

**Fig4-A**  
 **$\alpha$ -Tubulin on Hippocampus**

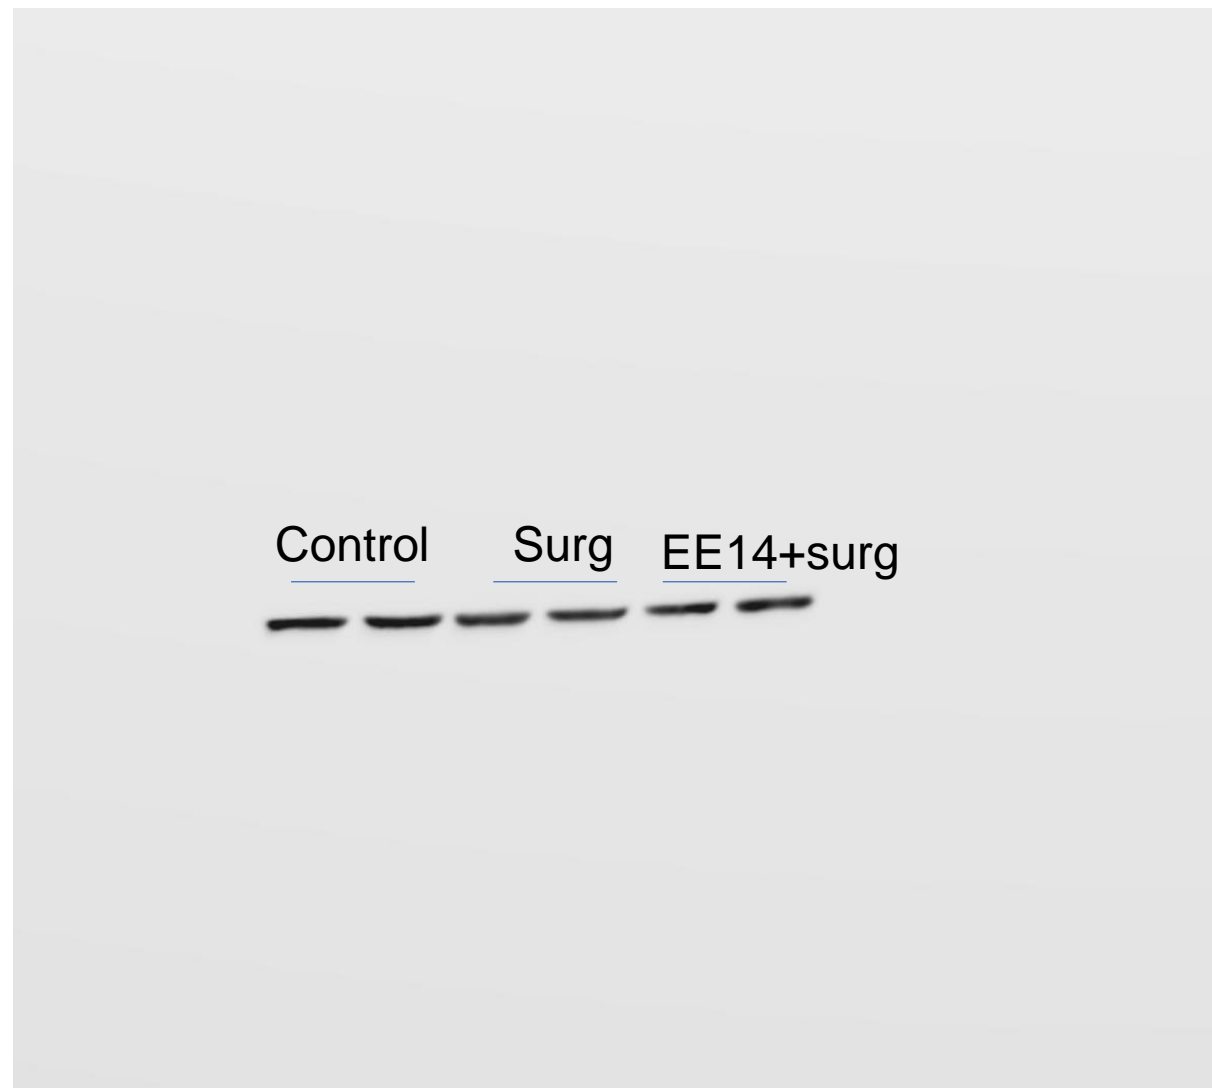

**Fig4-A**  
**Histone H4 on Hippocampus**

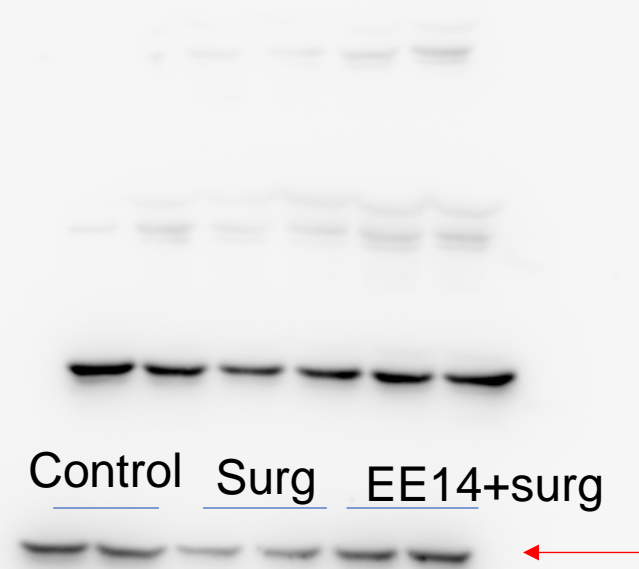

**Fig4-A**  
 **$\alpha$ -Tubulin on Hippocampus**

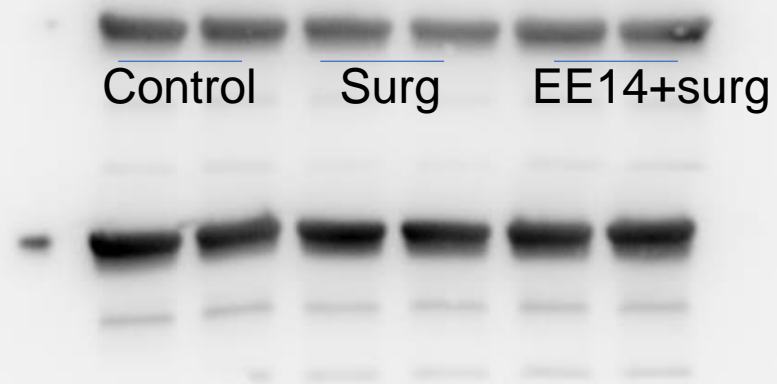



**Fig4-B**  
**Histone H3 on Cortex**

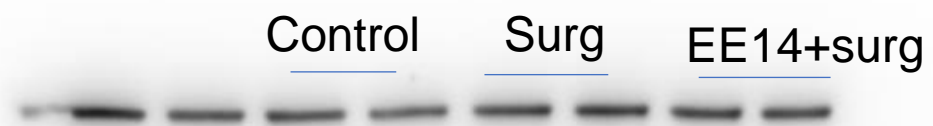



**Fig4-B**  
**Histone H4 on on Cortex**

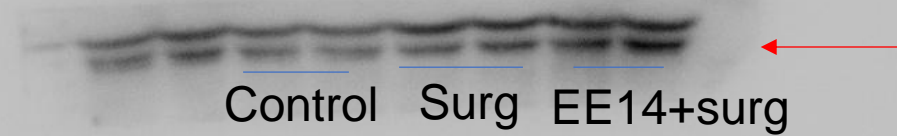

**Fig4-B**  
 **$\alpha$ -Tubulin on Cortex**

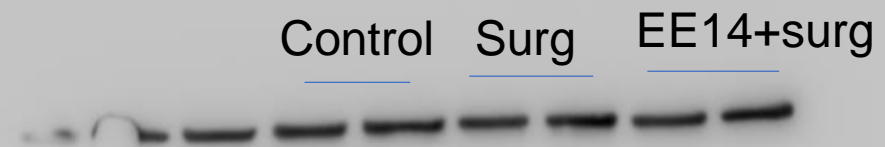

Supplement: CNS-28-619-s001.pdf [file CNS-28-619-s001.pdf]
